# Supplementary material
Source: PubMed Central journal article supplement (PMC7087410)

A

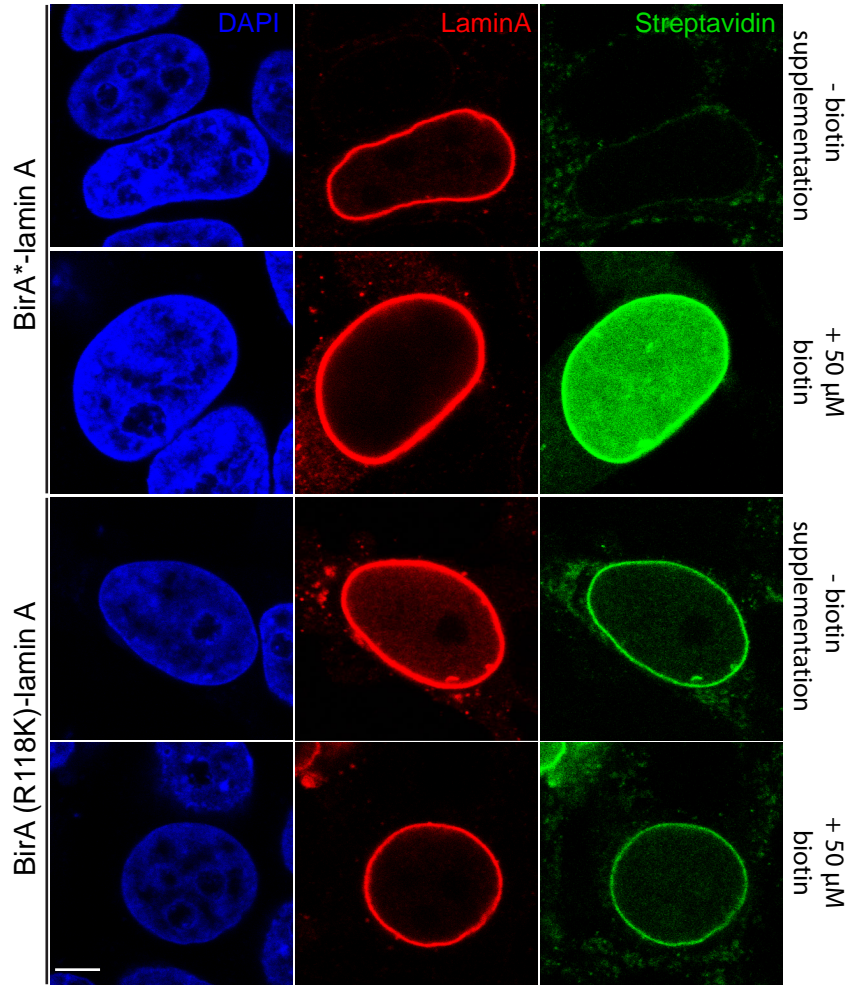

FIG S1

Supplement: NIHMS1512124-supplement-1.pdf [file NIHMS1512124-supplement-1.pdf]

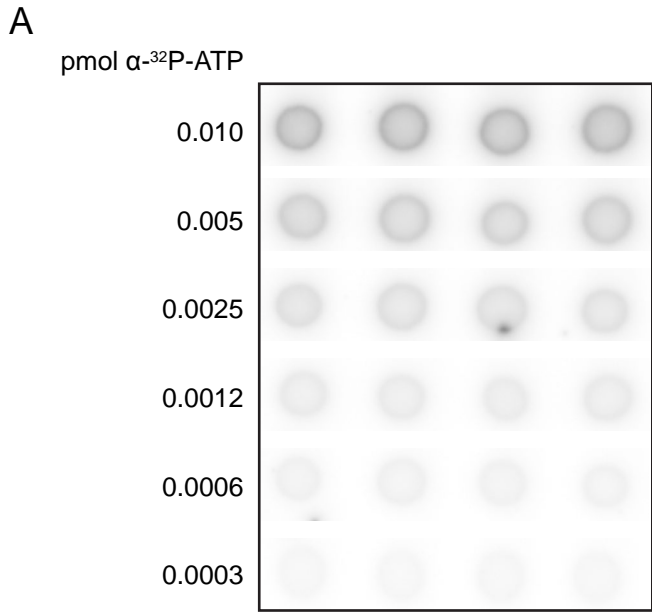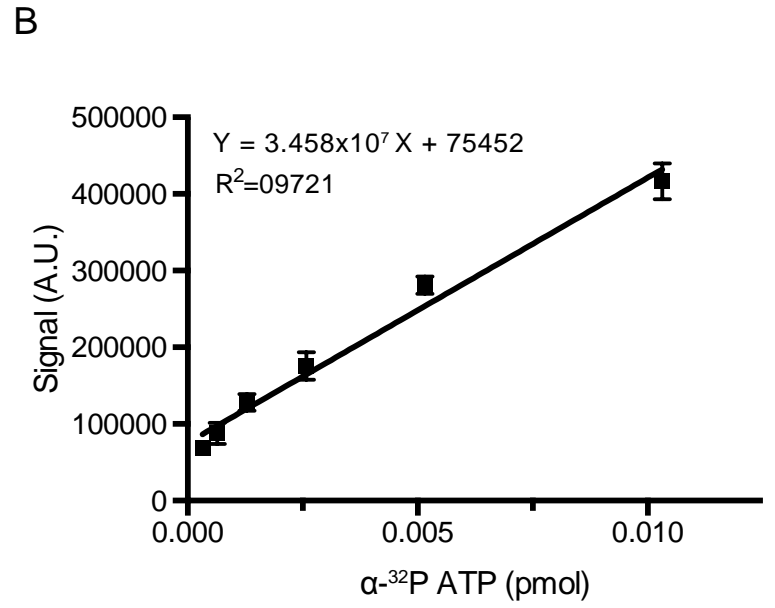

FIG S2

Supplement: NIHMS1512124-supplement-2.pdf [file NIHMS1512124-supplement-2.pdf]
